# Supplementary material
Source: ML conference proceedings conference paper supplement (https://proceedings.mlr.press/v84/el-halabi18a.html)
Supplement: Supplementary file [file el-halabi18a-supp.pdf]

## 7 Appendix

### 7.1 Variational forms of convex envelopes (Proof of lemma 2 and Remark 1)

In this section, we recall the different variational forms of the homogeneous convex envelope derived in [31] and derive similar variational forms for the non-homogeneous convex envelope, which includes the ones stated in lemma 2). These variational forms will be needed in some of our proofs below.

**Lemma 4.** *The homogeneous convex envelope  $\Omega_p$  of  $F_p$  admits the following variational forms.*

$$\Omega_\infty(w) = \min_\alpha \left\{ \sum_{S \subseteq V} \alpha_S F(S) : \sum_{S \subseteq V} \alpha_S \mathbf{1}_S \geq |w|, \alpha_S \geq 0 \right\}. \quad (9)$$

$$\Omega_p(w) = \min_v \left\{ \sum_{S \subseteq V} F(S)^{1/q} \|v^S\|_p : \sum_{S \subseteq V} v^S = |w|, \text{supp}(v^S) \subseteq S \right\}. \quad (10)$$

$$= \max_{\kappa \in \mathbb{R}_+^d} \sum_{i=1}^d \kappa_i^{1/q} |w_i| \text{ s.t. } \kappa(A) \leq F(A), \forall A \subseteq V. \quad (11)$$

$$= \inf_{\eta \in \mathbb{R}_+^d} \frac{1}{p} \sum_{j=1}^d \frac{|w_j|^p}{\eta_j^{p-1}} + \frac{1}{q} \Omega_\infty(\eta). \quad (12)$$

The non-homogeneous convex envelope of a set function  $F$ , over the unit  $\ell_\infty$ -ball was derived in [10], where it was shown that  $\Theta_\infty(w) = \inf_{\eta \in [0,1]^d} \{f(\eta) : \eta \geq |w|\}$  where  $f$  is any proper, l.s.c. convex extension of  $F$  (c.f., Lemma 1 [10]). A natural choice for  $f$  is the *convex closure* of  $F$ , which corresponds to the *tightest* convex extension of  $F$  on  $[0,1]^d$ . We recall the two equivalent definitions of convex closure, which we have adjusted to allow for infinite values.

**Definition 5** (Convex Closure; c.f., [9, Def. 3.1]). *Given a set function  $F : 2^V \rightarrow \overline{\mathbb{R}}$ , the convex closure  $f^- : [0,1]^d \rightarrow \overline{\mathbb{R}}$  is the point-wise largest convex function from  $[0,1]^d$  to  $\overline{\mathbb{R}}$  that always lowerbounds  $F$ .*

**Definition 6** (Equivalent definition of Convex Closure; c.f., [35, Def. 1] and [9, Def. 3.2]). *Given any set function  $f : \{0,1\}^n \rightarrow \overline{\mathbb{R}}$ , the convex closure of  $f$  can equivalently be defined  $\forall w \in [0,1]^n$  as:*

$$f^-(w) = \inf \left\{ \sum_{S \subseteq V} \alpha_S F(S) : w = \sum_{S \subseteq V} \alpha_S \mathbf{1}_S, \sum_{S \subseteq V} \alpha_S = 1, \alpha_S \geq 0 \right\}$$

It is interesting to note that  $f^-(w) = f_L(w)$  where  $f_L$  is Lovász extension iff  $F$  is a submodular function [35].

The following lemma derive variational forms of  $\Theta_p$  for any  $p \geq 1$  that parallel the ones known for the homogeneous envelope.

**Lemma 5.** *The non-homogeneous convex envelope  $\Theta_p$  of  $F_p$  admits the following variational forms.*

$$\Theta_\infty(w) = \inf \left\{ \sum_{S \subseteq V} \alpha_S F(S) : \sum_{S \subseteq V} \alpha_S \mathbf{1}_S \geq |w|, \sum_{S \subseteq V} \alpha_S = 1, \alpha_S \geq 0 \right\}. \quad (13)$$

$$\Theta_p(w) = \max_{\kappa \in \mathbb{R}_+^d} \sum_{j=1}^d \psi_j(\kappa_j, w_j) + \min_{S \subseteq V} F(S) - \kappa(S), \quad \forall w \in \text{dom}(\Theta_p(w)). \quad (14)$$

$$= \inf_{\eta \in [0,1]^d} \frac{1}{p} \sum_{j=1}^d \frac{|w_j|^p}{\eta_j^{p-1}} + \frac{1}{q} f^-(\eta), \quad (15)$$

where  $\text{dom}(\Theta_p) = \{w | \exists \eta \in [0,1]^d \text{ s.t. } \text{supp}(w) \subseteq \text{supp}(\eta), \eta \in \text{dom}(f^-)\}$ , and where we define

$$\psi_j(\kappa_j, w_j) := \begin{cases} \kappa_j^{1/q} |w_j| & \text{if } |w_j| \leq \kappa_j^{1/p}, \kappa_j \geq 0 \\ \frac{1}{p} |w_j|^p + \frac{1}{q} \kappa_j & \text{otherwise.} \end{cases}$$

If  $F$  is monotone,  $\Theta_\infty = f^-$ , then we can replace  $f^-$  by  $\Theta_\infty$  in (15) and we can restrict  $\kappa \in \mathbb{R}_+^d$  in (14).

To prove the variational form (13) in Lemma 5, we need to show first the following property of  $f^-$ .

**Proposition 5** (c.f., [9, Prop. 3.23]). *The minimum values of a proper set function  $F$  and its convex closure  $f^-$  are equal, i.e.,*

$$\min_{w \in [0,1]^d} f^-(w) = \min_{S \subseteq V} F(S)$$

*If  $S$  is a minimizer of  $f(S)$ , then  $\mathbb{1}_S$  is a minimizer of  $f^-$ . Moreover, if  $w$  is a minimizer of  $f^-$ , then every set in the support of  $\alpha$ , where  $f^-(w) = \sum_{S \subseteq V} \alpha_S F(S)$ , is a minimizer of  $F$ .*

*Proof.* First note that,  $\{0, 1\}^d \subseteq [0, 1]^d$  implies that  $f^-(w^*) \leq F(S^*)$ . On the other hand,  $f^-(w^*) = \sum_{S \subseteq V} \alpha_S^* F(S) \geq \sum_{S \subseteq V} \alpha_S^* F(S^*) = F(S^*)$ . The rest of the proposition follows directly.  $\square$

Given the choice of the extension  $f = f^-$ , the variational form (13) of  $\Theta_\infty$  given in lemma 5 follows directly from definition 6 and proposition 5, as shown in the following corollary.

**Corollary 4.** *Given any set function  $F : 2^V \rightarrow \overline{\mathbb{R}}_+$  and its corresponding convex closure  $f^-$ , the convex envelope of  $F(\text{supp}(w))$  over the unit  $\ell_\infty$ -ball is given by*

$$\begin{aligned} \Theta_\infty(w) &= \inf_{\alpha} \left\{ \sum_{S \subseteq V} \alpha_S F(S) : \sum_{S \subseteq V} \alpha_S \mathbb{1}_S \geq |w|, \sum_{S \subseteq V} \alpha_S = 1, \alpha_S \geq 0 \right\}. \\ &= \inf_v \left\{ \sum_{S \subseteq V} F(S) \|v^S\|_\infty : \sum_{S \subseteq V} v^S = |w|, \sum_{S \subseteq V} \|v^S\|_\infty = 1, \text{supp}(v^S) \subseteq S \right\}. \end{aligned}$$

*Proof.*  $f^-$  satisfies the first 2 assumptions required in Lemma 1 of [10], namely,  $f^-$  is a lower semi-continuous convex extension of  $F$  which satisfies

$$\max_{S \subseteq V} m(S) - F(S) = \max_{w \in [0,1]^d} m^T w - f^-(w), \forall m \in \mathbb{R}_+^d$$

To see this note that  $m^T w^* - f^-(w^*) = \sum_{S \subseteq V} \alpha_S^* (m^T \mathbb{1}_S - F(S)) \geq \sum_{S \subseteq V} \alpha_S^* (m^T \mathbb{1}_{S^*} - F(S^*)) = m(S^*) - F(S^*)$ . The other inequality is trivial. The corollary then follows directly from Lemma 1 in [10] and definition 6.  $\square$

Note that  $\text{dom}(\Theta_\infty) = \{w : \exists \eta \in [0, 1]^d \cap \text{dom}(f^-), \eta \geq |w|\}$ . Note also that  $\Theta_\infty$  is monotone even if  $F$  is not. On the other hand, if  $F$  is monotone, then  $f^-$  is monotone on  $[0, 1]^d$  and  $\Theta_\infty(w) = f^-(|w|)$ . Then the proof of remark 1 follows, since if  $F$  is a monotone submodular function and  $f_L$  is its Lovász extension, then  $\Theta_\infty(w) = f^-(|w|) = f_L(|w|) = \Omega_\infty(w), \forall w \in [-1, 1]^d$ , where the last equality was shown in [1].

Next, we derive the convex relaxation of  $F_p$  for a general  $p \geq 1$ .

**Proposition 6.** *Given any set function  $F : 2^V \rightarrow \overline{\mathbb{R}}_+$  and its corresponding convex closure  $f^-$ , the convex envelope of  $F_{\mu\lambda}(w) = \mu F(\text{supp}(w)) + \lambda \|w\|_p^p$  is given by*

$$\Theta_p(w) = \inf_{\eta \in [0,1]^d} \lambda \sum_{j=1}^d \frac{|w_j|^p}{\eta_j^{p-1}} + \mu f^-(\eta).$$

*Note that  $\text{dom}(\Theta_p) = \{w | \exists \eta \in [0, 1]^d \text{ s.t. } \text{supp}(w) \subseteq \text{supp}(\eta), \eta \in \text{dom}(f^-)\}$ .*

*Proof.* Given any proper l.s.c. convex extension  $f$  of  $F$ , we have:

First for the case where  $p = 1$ :

$$\begin{aligned} F_{\mu\lambda}^*(s) &= \sup_{w \in \mathbb{R}^n} w^T s - \mu F(\text{supp}(w)) - \lambda \|w\|_1 \\ &= \sup_{\eta \in \{0,1\}^d} \sup_{\substack{\mathbb{1}_{\text{supp}(w)} = \eta \\ \text{sign}(w) = \text{sign}(s)}} |w|^T (|s| - \lambda \mathbb{1}) - \mu F(\eta) \\ &= \iota_{\{|s| \leq \lambda \mathbb{1}\}}(s) - \inf_{\eta \in \{0,1\}^d} \mu F(\eta). \end{aligned}$$

Hence  $F_{\mu\lambda}^{**}(w) = \lambda\|w\|_1 + \inf_{\eta \in \{0,1\}^d} \lambda F(\eta)$ . For the case  $p \in (1, \infty)$ .

$$\begin{aligned}
 F_{\mu\lambda}^*(s) &= \sup_{w \in \mathbb{R}^d} w^T s - \mu F(\text{supp}(w)) - \lambda\|w\|_p^p \\
 &= \sup_{\eta \in \{0,1\}^d} \sup_{\substack{\mathbb{1}_{\text{supp}(w)} = \eta \\ \text{sign}(w) = \text{sign}(s)}} |w|^T |s| - \lambda\|w\|_p^p - \mu F(\eta) \\
 &= \sup_{\eta \in \{0,1\}^d} \frac{\lambda(p-1)}{(\lambda p)^q} \eta^T |s|^q - \mu F(\eta) \quad (|s_i| = \lambda p |x_i^*|^{p-1}, \forall \eta_i \neq 0) \\
 &= \sup_{\eta \in [0,1]^d} \frac{\lambda(p-1)}{(\lambda p)^q} \eta^T |s|^q - \mu f^-(\eta).
 \end{aligned}$$

We denote  $\hat{\lambda} = \frac{\lambda(p-1)}{(\lambda p)^q}$ .

$$\begin{aligned}
 F_{\mu\lambda}^{**}(w) &= \sup_{s \in \mathbb{R}^d} w^T s - F_{\mu\lambda}^*(s) \\
 &= \sup_{s \in \mathbb{R}^d} \min_{\eta \in [0,1]^d} s^T w - \hat{\lambda} \eta^T |s|^q + \mu f^-(\eta) \\
 &\stackrel{*}{=} \inf_{\eta \in [0,1]^d} \sup_{\substack{s \in \mathbb{R}^d \\ \text{sign}(s) = \text{sign}(w)}} |s|^T |w| - \hat{\lambda} \eta^T |s|^q + \mu f^-(\eta) \\
 &= \inf_{\eta \in [0,1]^d} \lambda(|w|^p)^T \eta^{1-p} + \mu f^-(\eta),
 \end{aligned}$$

where the last equality holds since  $|w_i| = \hat{\lambda} \eta_i q |s_i^*|^{q-1}, \forall \eta_i \neq 0$ , otherwise  $s_i^* = 0$  if  $w_i = 0$  and  $\infty$  otherwise.  $(\star)$  holds by Sion's minimax theorem [34, Corollary 3.3]. Note then that the minimizer  $\eta^*$  (if it exists) satisfies  $\text{supp}(w) \subseteq \text{supp}(\eta^*)$ . Finally, note that if we take the limit as  $p \rightarrow \infty$ , we recover  $\Theta_\infty = \inf_{\eta \in [0,1]^d} \{f^-(\eta) : \eta \geq |x|\}$ .  $\square$

The variational form (15) given in lemma 5 follows from proposition 6 for the choice  $\mu = \frac{1}{q}, \lambda = \frac{1}{p}$ .

The following proposition derives the variational form (14) for  $p = \infty$ .

**Proposition 7.** *Given any set function  $F : 2^V \rightarrow \mathbb{R} \cup \{+\infty\}$ , and its corresponding convex closure  $f^-$ ,  $\Theta_\infty$  can be written  $\forall w \in \text{dom}(\Theta_\infty)$  as*

$$\begin{aligned}
 \Theta_\infty(w) &= \max_{\kappa \in \mathbb{R}_+^d} \{\kappa^T |w| + \min_{S \subseteq V} F(S) - \kappa(S)\} \\
 &= \max_{\kappa \in \mathbb{R}_+^d} \{\kappa^T |w| + \min_{S \subseteq \text{supp}(w)} F(S) - \kappa(S)\} \quad (\text{if } F \text{ is monotone})
 \end{aligned}$$

Similarly  $\forall w \in \text{dom}(f^-)$  we can write

$$\begin{aligned}
 f^-(w) &= \max_{\kappa \in \mathbb{R}^d} \{\kappa^T |w| + \min_{S \subseteq V} F(S) - \kappa(S)\} \\
 &= \Theta_\infty(w) = \max_{\kappa \in \mathbb{R}_+^d} \{\kappa^T w + \min_{S \subseteq \text{supp}(w)} F(S) - \kappa(S)\} \quad (\text{if } F \text{ is monotone})
 \end{aligned}$$

*Proof.*  $\forall w \in \text{dom}(\Theta_\infty)$ , strong duality holds by Slater's condition, hence

$$\begin{aligned}
 \Theta_\infty(w) &= \min_{\alpha} \left\{ \sum_{S \subseteq V} \alpha_S F(S) : \sum_{S \subseteq V} \alpha_S \mathbb{1}_S \geq |w|, \sum_{S \subseteq V} \alpha_S = 1, \alpha_S \geq 0 \right\}. \\
 &= \min_{\alpha \geq 0} \max_{\rho \in \mathbb{R}, \kappa \in \mathbb{R}_+^d} \left\{ \sum_{S \subseteq V} \alpha_S F(S) + \kappa^T (|w| - \sum_{S \subseteq V} \alpha_S \mathbb{1}_S) + \rho (1 - \sum_{S \subseteq V} \alpha_S) \right\}. \\
 &= \max_{\rho \in \mathbb{R}, \kappa \in \mathbb{R}_+^d} \min_{\alpha \geq 0} \left\{ \kappa^T |w| + \sum_{S \subseteq V} \alpha_S (F(S) - \kappa^T \mathbb{1}_S - \rho) + \rho \right\}. \\
 &= \max_{\rho \in \mathbb{R}, \kappa \in \mathbb{R}_+^d} \{ \kappa^T |w| + \rho : F(S) \geq \kappa^T \mathbb{1}_S + \rho \}. \\
 &= \max_{\kappa \in \mathbb{R}_+^d} \{ \kappa^T |w| + \min_{S \subseteq V} F(S) - \kappa(S) \}.
 \end{aligned}$$

Let  $J = \text{supp}(|w|)$  then  $\kappa_{J^c}^* = 0$ . Then for monotone functions  $F(S) - \kappa^*(S) \geq F(S \cap J) - \kappa^*(S)$ , so we can restrict the minimum to  $S \subseteq J$ . The same proof holds for  $f^-$ , with the Lagrange multiplier  $\kappa \in \mathbb{R}^d$  not constrained to be positive.  $\square$

The following Corollary derives the variational form (14) for  $p \in [1, \infty]$ .

**Corollary 5.** *Given any set function  $F : 2^V \rightarrow \mathbb{R} \cup \{+\infty\}$ ,  $\Theta_p$  can be written  $\forall w \in \text{dom}(\Theta_p)$  as*

$$\begin{aligned} \Theta_p(w) &= \max_{\kappa \in \mathbb{R}^d} \sum_{j=1}^d \psi_j(\kappa_j, w_j) + \min_{S \subseteq V} F(S) - \kappa(S). \\ &= \max_{\kappa \in \mathbb{R}_+^d} \sum_{j=1}^d \psi_j(\kappa_j, w_j) + \min_{S \subseteq V} F(S) - \kappa(S). \end{aligned} \quad (\text{if } F \text{ is monotone})$$

where

$$\psi_j(\kappa_j, w_j) := \begin{cases} \kappa_j^{1/q} |w_j| & \text{if } |w_j| \leq \kappa_j^{1/p}, \kappa_j \geq 0 \\ \frac{1}{p} |w_j|^p + \frac{1}{q} \kappa_j & \text{otherwise} \end{cases}$$

*Proof.* By Propositions 6 and 7, we have  $\forall w \in \text{dom}(\Theta_p)$ , i.e.,  $\exists \eta \in [0, 1]^d$ , s.t  $\text{supp}(w) \subseteq \text{supp}(\eta)$ ,  $\eta \in \text{dom}(f^-)$ ,

$$\begin{aligned} \Theta_p(w) &= \inf_{\eta \in [0, 1]^d} \frac{1}{p} \sum_{j=1}^d \frac{|w_j|^p}{\eta_j^{p-1}} + \frac{1}{q} f^-(\eta) \\ &= \inf_{\eta \in [0, 1]^d} \frac{1}{p} \sum_{j=1}^d \frac{|w_j|^p}{\eta_j^{p-1}} + \frac{1}{q} \max_{\rho \in \mathbb{R}, \kappa \in \mathbb{R}^d} \{\kappa^T \eta + \rho : F(S) \geq \kappa^T \mathbf{1}_S + \rho\}. \\ &\stackrel{*}{=} \max_{\rho \in \mathbb{R}, \kappa \in \mathbb{R}^d} \inf_{\eta \in [0, 1]^d} \left\{ \frac{1}{p} \sum_{j=1}^d \frac{|w_j|^p}{\eta_j^{p-1}} + \frac{1}{q} \kappa^T \eta + \rho : F(S) \geq \kappa^T \mathbf{1}_S + \rho \right\}. \end{aligned}$$

(\*) holds by Sion's minimax theorem [34, Corollary 3.3]. Note also that

$$\inf_{\eta_j \in [0, 1]} \frac{1}{p} \frac{|w_j|^p}{\eta_j^{p-1}} + \frac{1}{q} \kappa_j \eta_j = \begin{cases} \kappa_j^{1/q} |w_j| & \text{if } |w_j| \leq \kappa_j^{1/p}, \kappa_j \geq 0 \\ \frac{1}{p} |w_j|^p + \frac{1}{q} \kappa_j & \text{otherwise} \end{cases} := \psi_j(\kappa_j, w_j)$$

where the minimum is  $\eta_j^* = 1$  if  $\kappa_j \leq 0$ . If  $\kappa_j \geq 0$ , the infimum is zero if  $w_j = 0$ . Otherwise, the minimum is achieved at  $\eta_j^* = \min\{\frac{|w_j|}{\kappa_j^{1/p}}, 1\}$  (if  $\kappa_j = 0$ ,  $\eta_j^* = 1$ ). Hence,

$$\Theta_p(w) = \max_{\kappa \in \mathbb{R}^d} \sum_{j=1}^d \psi_j(\kappa_j, w_j) + \min_{S \subseteq V} F(S) - \kappa(S).$$

$\square$

## 7.2 Necessary conditions for support recovery (Proof of Theorem 1)

Before proving Theorem 1, we need the following technical Lemma.

**Lemma 6.** *Given  $J \subset V$  and a vector  $w$  s.t  $\text{supp}(w) \subseteq J$ , if  $\Phi$  is not decomposable at  $w$  w.r.t  $J$ , then  $\exists i \in J^c$  such that the  $i$ -th component of all subgradients at  $w$  is zero;  $0 = [\partial\Phi(w)]_i$ .*

*Proof.* If  $\Phi$  is not decomposable at  $w$  and  $0 \neq [\partial\Phi(w)]_i, \forall i \in J^c$ , then  $\forall M_J > 0, \exists \Delta \neq 0, \text{supp}(\Delta) \subseteq J^c$  s.t.,  $\Phi(w + \Delta) < \Phi(w) + M_J \|\Delta\|_\infty$ . In particular, we can choose  $M_J = \inf_{i \in J^c, v \in \partial\Phi(w), v_i \neq 0} |v_i| > 0$ , if the inequality holds for some  $\Delta \neq 0$ , then let  $i_{\max}$  denote the index where  $|\Delta_{i_{\max}}| = \|\Delta\|_\infty$ . Then given any  $v \in \partial\Phi(w)$  s.t.,  $v_{i_{\max}} \neq 0$ , we have

$$\begin{aligned} \Phi(w + \|\Delta\|_\infty \mathbf{1}_{i_{\max}}) &\leq \Phi(w + \Delta) < \Phi(w) + M_J \|\Delta\|_\infty \\ &\leq \Phi(w) + \langle v, \|\Delta\|_\infty \mathbf{1}_{i_{\max}} \text{sign}(v_{i_{\max}}) \rangle \\ &\leq \Phi(w + \|\Delta\|_\infty \mathbf{1}_{i_{\max}}) \end{aligned}$$

which leads to a contradiction.  $\square$

**Theorem 1.** *The minimizer  $\hat{w}$  of  $\min_{w \in \mathbb{R}^d} L(w) - z^\top w + \lambda \Phi(w)$ , where  $L$  is a strongly-convex and smooth loss function and  $z \in \mathbb{R}^d$  has a continuous density w.r.t to the Lebesgue measure, has a weakly stable support w.r.t.  $\Phi$ , with probability one.*

*Proof.* We will show in particular that  $\Phi$  is decomposable at  $\hat{w}$  w.r.t  $\text{supp}(\hat{w})$ . Since  $L$  is strongly-convex, given  $z$  the corresponding minimizer  $\hat{w}$  is unique, then the function  $h(z) := \arg \min_{w \in \mathbb{R}^d} L(w) - z^\top w + \lambda \Phi(w)$  is well defined. We want to show that

$$\begin{aligned} & P(\forall z, \Phi \text{ is decomposable at } h(z) \text{ w.r.t } \text{supp}(h(z))) \\ &= 1 - P(\exists z, \text{ s.t. } \Phi \text{ is not decomposable at } h(z) \text{ w.r.t } \text{supp}(h(z))) \\ &\geq 1 - P(\exists z, \text{ s.t.}, \exists i \in (\text{supp}(h(z)))^c, [\partial \Phi(h(z))]_i = 0) \qquad \text{by lemma 6} \\ &= 1. \end{aligned}$$

Given fixed  $i \in V$ , we show that the set  $S_i := \{z : i \in (\text{supp}(h(z)))^c, [\partial \Phi(h(z))]_i = 0\}$  has measure zero. Then, taking the union of the finitely many sets  $S_i, \forall i \in V$ , all of zero measure, we have  $P(\exists z, \text{ s.t.}, \exists i \in (\text{supp}(h(z)))^c, [\partial \Phi(h(z))]_i = 0) = 0$ .

To show that the set  $S_i$  has measure zero, let  $z_1, z_2 \in S_i$  and denote by  $\mu > 0$  the strong convexity constant of  $L$ . We have by convexity of  $\Phi$ :

$$\begin{aligned} & \left( (z_1 - \nabla L(h(z_1))) - (z_2 - \nabla L(h(z_2))) \right)^\top (h(z_1) - h(z_2)) \geq 0 \\ & (z_1 - z_2)^\top (h(z_1) - h(z_2)) \geq (\nabla L(h(z_1)) - \nabla L(h(z_2)))^\top (h(z_1) - h(z_2)) \\ & (z_1 - z_2)^\top (h(z_1) - h(z_2)) \geq \mu \|h(z_1) - h(z_2)\|_2^2 \\ & \frac{1}{\mu} \|z_1 - z_2\|_2 \geq \|h(z_1) - h(z_2)\|_2 \end{aligned}$$

Thus  $h$  is a deterministic Lipschitz-continuous function of  $z$ . Let  $J = \text{supp}(h(z))$ , then by optimality conditions  $z_J - \nabla L(h(z_J)) \in \partial \Phi(h(z_J))$  (since  $h(z) = h(z_J)$ ), then  $z_i - \nabla L(h(z_J))_i = 0$  since  $[\partial \Phi(h(z_J))]_i = 0$ . and thus  $z_i$  is a Lipschitz-continuous function of  $z_J$ , which can only happen with zero measure.  $\square$

### 7.3 Sufficient conditions for support recovery (Proof of Lemma 3 and Theorem 2)

**Lemma 3.** *Let  $\Phi$  be a monotone convex function,  $\Phi(|w|^\alpha)$  admits the following majorizer,  $\forall w^0 \in \mathbb{R}^d, \Phi(|w|^\alpha) \leq (1 - \alpha)\Phi(|w^0|^\alpha) + \alpha\Phi(|w^0|^{\alpha-1} \circ |w|)$ , which is tight at  $w^0$ .*

*Proof.* The function  $w \rightarrow w^\alpha$  is concave on  $\mathbb{R}_+ \setminus \{0\}$ , hence

$$\begin{aligned} |w_j|^\alpha &\leq |w_j^0|^\alpha + \alpha |w_j^0|^{\alpha-1} (|w_j| - |w_j^0|) \\ |w_j|^\alpha &\leq (1 - \alpha) |w_j^0|^\alpha + \alpha |w_j^0|^{\alpha-1} |w_j| \\ \Phi(|w|^\alpha) &\leq \Phi((1 - \alpha) |w^0|^\alpha + \alpha |w^0|^{\alpha-1} \circ |w_j|) \qquad \text{(by monotonicity)} \\ \Phi(|w|^\alpha) &\leq (1 - \alpha) \Phi(|w^0|^\alpha) + \alpha \Phi(|w^0|^{\alpha-1} \circ |w|) \qquad \text{(by convexity)} \end{aligned}$$

If  $w_j = 0$  for any  $j$ , the upper bound goes to infinity and hence it still holds.  $\square$

**Theorem 2.** *[Consistency and Support Recovery] Let  $\Phi : \mathbb{R}^d \rightarrow \overline{\mathbb{R}}_+$  be a proper normalized absolute monotone convex function and denote by  $J$  the true support  $J = \text{supp}(w^*)$ . If  $|w^*|^\alpha \in \text{int dom } \Phi$ ,  $J$  is strongly stable with respect to  $\Phi$  and  $\lambda_n$  satisfies  $\frac{\lambda_n}{\sqrt{n}} \rightarrow 0, \frac{\lambda_n}{n^{\alpha/2}} \rightarrow \infty$ , then the estimator (6) is consistent and asymptotically normal, i.e., it satisfies*

$$\sqrt{n}(\hat{w}_J - w_J^*) \xrightarrow{d} \mathcal{N}(0, \sigma^2 Q_{JJ}^{-1}), \tag{7}$$

and

$$P(\text{supp}(\hat{w}) = J) \rightarrow 1. \tag{8}$$

*Proof.* We will follow the proof in [38]. We write  $\hat{w} = w^* + \frac{\hat{u}}{\sqrt{n}}$  and  $\Psi_n(u) = \frac{1}{2} \|y - X(w^* + \frac{u}{\sqrt{n}})\|_2^2 + \lambda_n \Phi(c \circ |w^* + \frac{u}{\sqrt{n}}|)$ , where  $c = |w^0|^{\alpha-1}$ . Then  $\hat{u} = \arg \min_{u \in \mathbb{R}^d} \Psi_n(u)$ . Let  $V_n(u) = \Psi_n(u) - \Psi_n(0)$ , then

$$V_n(u) = \frac{1}{2} u^T Q u - \epsilon^T \frac{X u}{\sqrt{n}} + \lambda_n (\Phi(c \circ |w^* + \frac{u}{\sqrt{n}}|) - \Phi(c \circ |w^*|))$$

Since  $w^0$  is a  $\sqrt{n}$ -consistent estimator to  $w^*$ , then  $\sqrt{n} w_{J^c}^0 = O_p(1)$  and  $n^{\frac{1-\alpha}{2}} c_{J^c}^{-1} = O_p(1)$ . Since  $\frac{\lambda_n}{n^{\frac{\alpha-1}{2}}} \rightarrow \infty$ , by stability of  $J$ , we have

$$\begin{aligned} \lambda_n (\Phi(c \circ |w^* + \frac{u}{\sqrt{n}}|) - \Phi(c \circ |w^*|)) &= \lambda_n (\Phi(c_J \circ |w_J^* + \frac{u_J}{\sqrt{n}}| + c_{J^c} \circ \frac{|u_{J^c}|}{\sqrt{n}}) - \Phi(c_J \circ |w_J^*|)) \\ &\geq \lambda_n (\Phi(c_J \circ |w_J^* + \frac{u_J}{\sqrt{n}}|) + M_J \|c_{J^c} \circ \frac{|u_{J^c}|}{\sqrt{n}}\|_\infty - \Phi(c_J \circ |w_J^*|)) \\ &= \lambda_n (\Phi(c_J \circ |w_J^* + \frac{u_J}{\sqrt{n}}|) - \Phi(c_J \circ |w_J^*|)) + M_J \lambda_n n^{-\alpha/2} n^{\frac{\alpha-1}{2}} c_{J^c} \circ |u_{J^c}| \|_\infty \\ &\xrightarrow{p} \infty \quad \text{if } u_{J^c} \neq 0 \end{aligned} \quad (16)$$

Otherwise, if  $u_{J^c} = 0$ , we argue that

$$\lambda_n (\Phi(c \circ |w^* + \frac{u}{\sqrt{n}}|) - \Phi(c \circ |w^*|)) = \lambda_n (\Phi(c_J \circ |w_J^* + \frac{u_J}{\sqrt{n}}|) - \Phi(c_J \circ |w_J^*|)) \xrightarrow{p} 0. \quad (17)$$

To see this note first that since  $w^0$  is a  $\sqrt{n}$ -consistent estimator to  $w^*$ , then  $c_J = |w_J^0|^{\alpha-1} \xrightarrow{p} |w_J^*|^{\alpha-1}$ ,  $c_J \circ |w_J^*| \xrightarrow{p} |w_J^*|^\alpha$  and  $c_J \circ |w_J^* + \frac{u_J}{\sqrt{n}}| \xrightarrow{p} |w_J^*|^\alpha$ . Then by the assumption  $|w^*|^\alpha \in \text{int dom } \Phi$ , we have that both  $c_J \circ |w_J^*|, c_J \circ |w_J^* + \frac{u_J}{\sqrt{n}}| \in \text{int dom } \Phi$  with probability going to one. By convexity, we then have:

$$\begin{aligned} \lambda_n (\Phi(c_J \circ |w_J^* + \frac{u_J}{\sqrt{n}}|) - \Phi(c_J \circ |w_J^*|)) &\geq \langle \nabla \Phi(c_J \circ |w_J^*|), \lambda_n \frac{u_J}{\sqrt{n}} \rangle \\ \lambda_n (\Phi(c_J \circ |w_J^* + \frac{u_J}{\sqrt{n}}|) - \Phi(c_J \circ |w_J^*|)) &\leq \langle \nabla \Phi(c_J \circ |w_J^* + \frac{u_J}{\sqrt{n}}|), \lambda_n \frac{u_J}{\sqrt{n}} \rangle \end{aligned}$$

where  $\nabla \Phi(w)$  denotes a subgradient of  $\Phi$  at  $w$ .

For all  $w \in \text{int dom } \Phi$  where  $\Phi$  is convex, monotone and normalized, we have that  $\|z\|_\infty < \infty, \forall z \in \partial \Phi(w)$ . To see this, note that since  $w \in \text{int dom } \Phi, \exists \delta > 0$  s.t.,  $\forall w' \in B_\delta(w), \Phi(w') < +\infty$ . Let  $w' = w + \text{sign}(z) \mathbb{1}_{i_{\max}} \delta$ , where  $i_{\max}$  denotes the index where  $|z_{i_{\max}}| = \|z\|_\infty$  then by convexity we have

$$\begin{aligned} \Phi(w') &\geq \Phi(w) + \langle z, w' - w \rangle, & \forall z \in \partial \Phi(w) \\ +\infty &> \Phi(w') \geq \|z\|_\infty \delta, & \forall z \in \partial \Phi(w), \quad (\text{since } \Phi(w) \geq 0) \end{aligned}$$

Since  $\frac{\lambda_n}{\sqrt{n}} \rightarrow 0$ , we can then conclude by Slutsky's theorem that (17) holds.

Hence by (16) and (17),

$$\lambda_n (\Phi(c \circ |w^* + \frac{u}{\sqrt{n}}|) - \Phi(c \circ |w^*|)) \xrightarrow{p} \begin{cases} 0 & \text{if } u_{J^c} = 0 \\ \infty & \text{Otherwise} \end{cases}. \quad (18)$$

By CLT,  $\frac{X^T \epsilon}{\sqrt{n}} \xrightarrow{d} W \sim \mathcal{N}(0, \sigma^2 Q)$ , it follows then that  $V_n(u) \xrightarrow{d} V(u)$ , where

$$V(u) = \begin{cases} \frac{1}{2} u_J^T Q_{JJ} u_J - W_J^T u_J & \text{if } u_{J^c} = 0 \\ \infty & \text{Otherwise} \end{cases}.$$

$V_n$  is convex and the unique minimum of  $V$  is  $u_J = Q_{JJ}^{-1} W_J, u_{J^c} = 0$ , hence by epi-convergence results [c.f., [38]]

$$\hat{u}_J \xrightarrow{d} Q_{JJ}^{-1} W_J \sim \mathcal{N}(0, \sigma^2 Q_{JJ}^{-1}), \quad \hat{u}_{J^c} \xrightarrow{d} 0. \quad (19)$$

Since  $\hat{u} = \sqrt{n}(\hat{w} - w^*)$ , then it follows from (19) that

$$\hat{w}_J \xrightarrow{p} w_J^*, \quad \hat{w}_{J^c} \xrightarrow{p} 0 \quad (20)$$

Hence,  $P(\text{supp}(\hat{w}) \supseteq J) \rightarrow 1$  and it is sufficient to show that  $P(\text{supp}(\hat{w}) \subseteq J) \rightarrow 1$  to complete the proof.

For that denote  $\hat{J} = \text{supp}(\hat{w})$  and let's consider the event  $\hat{J} \setminus J \neq \emptyset$ . By optimality conditions, we know that

$$-X_{\hat{J} \setminus J}^T (X\hat{w} - y) \in \lambda_n [\partial\Phi(c \circ \cdot)(\hat{w})]_{\hat{J} \setminus J}$$

Note, that  $-\frac{X_{\hat{J} \setminus J}^T (X\hat{w} - y)}{\sqrt{n}} = \frac{X_{\hat{J} \setminus J}^T X(\hat{w} - w^*)}{\sqrt{n}} - \frac{X_{\hat{J} \setminus J}^T \epsilon}{\sqrt{n}}$ . By CLT,  $\frac{X_{\hat{J} \setminus J}^T \epsilon}{\sqrt{n}} \xrightarrow{d} W \sim \mathcal{N}(0, \sigma^2 Q_{\hat{J} \setminus J, \hat{J} \setminus J})$  and by (20)  $\hat{w} - w^* \xrightarrow{p} 0$  then  $-\frac{X_{\hat{J} \setminus J}^T (X\hat{w} - y)}{\sqrt{n}} = O_p(1)$ .

On the other hand,  $\frac{\lambda_n c_{\hat{J} \setminus J}}{\sqrt{n}} = \lambda_n n^{\frac{1-\alpha}{2}} n^{\frac{\alpha-1}{2}} c_{\hat{J} \setminus J} \rightarrow \infty$ , hence  $\frac{\lambda_n c_{\hat{J} \setminus J}}{\sqrt{n}} c_{\hat{J} \setminus J}^{-1} v_{\hat{J} \setminus J} \rightarrow \infty, \forall v \in \partial\Phi(c \circ \cdot)(\hat{w})$ , since  $c_{\hat{J} \setminus J}^{-1} v_{\hat{J} \setminus J} = O_p(1)^{-1}$ . To see this, let  $w'_J = \hat{w}_J$  and 0 elsewhere. Note that by definition of the subdifferential and the stability assumption on  $J$ , there must exist  $M_J > 0$  s.t

$$\begin{aligned} \Phi(c \circ w') &\geq \Phi(c \circ \hat{w}) + \langle v_{\hat{J} \setminus J}, -\hat{w}_{\hat{J} \setminus J} \rangle \\ &\geq \Phi(c \circ w') + M_J \|c_{\hat{J} \setminus J} \circ \hat{w}_{\hat{J} \setminus J}\|_\infty - \|c_{\hat{J} \setminus J}^{-1} \circ v_{\hat{J} \setminus J}\|_1 \|c_{\hat{J} \setminus J} \circ \hat{w}_{\hat{J} \setminus J}\|_\infty \\ \|c_{\hat{J} \setminus J}^{-1} \circ v_{\hat{J} \setminus J}\|_1 &\geq M_J \end{aligned}$$

We deduce then  $P(\text{supp}(\hat{w}) \subseteq J) = 1 - P(\hat{J} \setminus J \neq \emptyset) = 1 - P(\text{optimality condition holds}) \rightarrow 1$ .  $\square$

#### 7.4 Discrete stability (Proof of Proposition 2 and relation to weak submodularity)

**Proposition 2.** *If  $F$  is a finite-valued monotone function,  $F$  is  $\rho$ -submodular iff discrete weak stability is equivalent to strong stability.*

*Proof.* If  $F$  is  $\rho$ -submodular and  $J$  is weakly stable, then  $\forall A \subseteq J, \forall i \in J^c, 0 < \rho[F(J \cup \{i\}) - F(J)] \leq F(J \cup \{i\}) - F(J)$ , i.e.,  $J$  is strongly stable w.r.t.  $F$ . If  $F$  is such that any weakly stable set is also strongly stable, then if  $F$  is not  $\rho$ -submodular, then  $\forall \rho \in (0, 1]$  there must exist a set  $B \subseteq V$ , s.t.,  $\exists A \subseteq B, i \in B^c$ , s.t.,  $\rho[F(B \cup \{i\}) - F(B)] > F(A \cup \{i\}) - F(A) \geq 0$ . Hence,  $F(B \cup \{i\}) - F(B) > 0$ , i.e.,  $B$  is weakly stable and thus it is also strongly stable and we must have  $F(A \cup \{i\}) - F(A) > 0$ . Choosing then in particular,  $\rho = \min_{B \subseteq V} \min_{A \subseteq B, i \in B^c} \frac{F(A \cup \{i\}) - F(A)}{F(B \cup \{i\}) - F(B)} \in (0, 1]$ , leads to a contradiction;  $\min_{A \subseteq B, i \in B^c} F(A \cup \{i\}) - F(A) \geq \rho[F(B \cup \{i\}) - F(B)] > F(A \cup \{i\}) - F(A)$ .  $\square$

We show that  $\rho$ -submodularity is a stronger condition than weak submodularity. First, we recall the definition of weak submodular functions.

**Definition 7** (Weak Submodularity (c.f., [7, 11])). *A function  $F$  is weakly submodular if  $\forall S, L, S \cap L = \emptyset, F(L \cup S) - F(L) > 0$ ,*

$$\gamma_{S,L} = \frac{\sum_{i \in S} F(L \cup \{i\}) - F(L)}{F(L \cup S) - F(L)} > 0$$

**Proposition 8.** *If  $F$  is  $\rho$ -submodular then  $F$  is weakly submodular. But the converse is not true.*

*Proof.* If  $F$  is  $\rho$ -submodular then  $\forall S, L, S \cap L = \emptyset, F(L \cup S) - F(L) > 0$ , let  $S = \{i_1, i_2, \dots, i_r\}$

$$\begin{aligned} F(L \cup S) - F(L) &= \sum_{k=1}^r F(L \cup \{i_1, \dots, i_k\}) - F(L \cup \{i_1, \dots, i_{k-1}\}) \\ &\leq \sum_{k=1}^r \frac{1}{\rho} (F(L \cup \{i_k\}) - F(L)) \\ &\Rightarrow \gamma_{S,T} = \rho > 0. \end{aligned}$$

We show that the converse is not true by giving a counter-example: Consider the function defined on  $V = \{1, 2, 3\}$ , where  $F(\{i\}) = 1, \forall i, F(\{1, 2\}) = 1, F(\{2, 3\}) = 2, F(\{1, 3\}) = 2, F(\{1, 2, 3\}) = 3$ . Then note that this function is weakly submodular. We only need to consider sets  $|S| \geq 2$ , since otherwise  $\gamma_{S,T} > 0$  holds trivially. Accordingly, we also only need to consider  $L$  which is the empty set or a singleton. In both cases  $\gamma_{S,T} > 0$ . However, this  $F$  is not  $\rho$ -submodular, since  $F(1, 2) - F(1) = 0 < \rho(F(1, 2, 3) - F(1, 3)) = \rho$  for any  $\rho > 0$ .  $\square$

### 7.5 Relation between discrete and continuous stability (Proof of Propositions 3 and 4, and Corollary 3)

First, we present a useful simple lemma, which provides an equivalent definition of decomposability for monotone function.

**Lemma 7.** *Given  $w \in \mathbb{R}^d, J \subseteq J, \text{supp}(w) = J$ , if  $\Phi$  is a monotone function, then  $\Phi$  is decomposable at  $w$  w.r.t  $J$  iff  $\exists M_J > 0, \forall \delta > 0, i \in J^c, \text{s.t.}$*

$$\Phi(w + \delta \mathbf{1}_i) \geq \Phi(w) + M_J \delta.$$

*Proof.* By definition 2,  $\exists M_J > 0, \forall \Delta \in \mathbb{R}^d, \text{supp}(\Delta) \subseteq J^c$ ,

$$\Phi(w + \Delta) \geq \Phi(w) + M_J \|\Delta\|_\infty.$$

in particular this must hold for  $\Delta = \delta \mathbf{1}_i$ . On the other hand, if the inequality hold for all  $\delta \mathbf{1}_i$ , then given any  $\Delta$  s.t.  $\text{supp}(\Delta) \subseteq J^c$  let  $i_{\max}$  be the index where  $\Delta_{i_{\max}} = \|\Delta\|_\infty$  and let  $\delta = \|\Delta\|_\infty$ , then

$$\Phi(w + \Delta) \geq \Phi(w + \delta \mathbf{1}_{i_{\max}}) \geq \Phi(w) + M_J \delta = \Phi(w) + M_J \|\Delta\|_\infty.$$

$\square$

**Proposition 3.** *Given any monotone set function  $F$ , all sets  $J \subseteq V$  strongly stable w.r.t to  $F$  are also strongly stable w.r.t  $\Omega_p$  and  $\Theta_p$ .*

*Proof.* We make use of the variational form (11). Given a set  $J$  stable w.r.t to  $F$  and  $\text{supp}(w) \subseteq J$ , let  $\kappa^* \in \arg \max_{\kappa \in \mathbb{R}_+^d} \{\sum_{i \in J} \kappa_i^{1/q} |w_i| : \kappa(A) \leq F(A), \forall A \subseteq V\}$ , then  $\Omega(w) = |w_J|^T (\kappa_J^*)^{1/q}$ . Note that  $\forall A \subseteq J, F(A \cup i) > F(A)$ , by definition 3. Hence,  $\forall i \in J^c$ , we can define  $\kappa' \in \mathbb{R}_+^d$  s.t.,  $\kappa'_J = \kappa_J^*, \kappa'_{(J \cup i)^c} = 0$  and  $\kappa'_i = \min_{A \subseteq J} F(A \cup i) - F(A) > 0$ . Note that  $\kappa'$  is feasible, since  $\forall A \subseteq J, \kappa'(A) = \kappa^*(A) \leq F(A)$  and  $\kappa'(A + i) = \kappa^*(A) + \kappa'_i \leq F(A) + F(A \cup i) - F(A) = F(A \cup i)$ . For any other set  $\kappa'(A) = \kappa'(A \cap (J + i)) \leq F(A \cap (J + i)) \leq F(A)$ , by monotonicity. It follows then that  $\Omega(w + \delta \mathbf{1}_i) = \max_{\kappa \in \mathbb{R}_+^d} \{\sum_{i \in J \cup i} \kappa_i^{1/q} |w_i| : \kappa(A) \leq F(A), \forall A \subseteq V\} \geq |w_J|^T (\kappa_J^*)^{1/q} + \delta (\kappa'_i)^{1/q} \geq \Omega(w) + \delta M$ , with  $M = (\kappa'_i)^{1/q} > 0$ . The proposition then follows by lemma 7.

Similarly, the proof for  $\Theta_p$  follows in a similar fashion. We make use of the variational form (14). Given a set  $J$  stable w.r.t to  $F$  and  $\text{supp}(w) \subseteq J$ , first note that this implicitly implies that  $F(J) < +\infty$  and hence  $\Theta_p(w) < +\infty$ . Let  $\kappa^* \in \arg \max_{\kappa \in \mathbb{R}_+^d} \sum_{j=1}^d \psi_j(\kappa_j, w_j) + \min_{S \subseteq V} F(S) - \kappa(S)$  and  $S^* \in \arg \min_{S \subseteq J} F(S) - \kappa^*(S)$ . Note that  $\forall S \subseteq J, \forall i \in J^c, F(S \cup i) > F(S)$ , by definition 3. Hence,  $\forall i \in J^c$ , we can define  $\kappa' \in \mathbb{R}_+^d$  s.t.,  $\kappa'_J = \kappa_J^*, \kappa'_{(J \cup i)^c} = 0$  and  $\kappa'_i = \min_{S \subseteq J} F(S \cup i) - F(S) > 0$ . Note that  $\forall S \subseteq J, F(S) - \kappa'(S) = F(S) - \kappa^*(S) \geq F(S^*) - \kappa^*(S^*)$  and  $F(S + i) - \kappa'(S + i) = F(S + i) - \kappa^*(S) - \kappa'_i \geq F(S + i) - \kappa^*(S) - F(S + i) + F(S) \geq F(S^*) - \kappa^*(S^*)$ . Note also that  $\psi_i(\kappa'_i, \delta) = (\kappa'_i)^{1/q} \delta$  if  $\delta \leq (\kappa'_i)^{1/p}$ , and  $\psi_i(\kappa'_i, \delta) = \frac{1}{p} \delta^p + \frac{1}{q} \kappa'_i = \delta (\frac{1}{p} \delta^{p-1} + \frac{1}{q} \kappa'_i \delta^{-1}) \geq \delta (\kappa'_i)^{1/q}$  otherwise. It follows then that  $\Theta_p(w + \delta \mathbf{1}_i) \geq \sum_{j \in J} \psi_j(\kappa_j, w_j) + (\kappa'_i)^{1/q} \delta + \min_{S \subseteq J \cup i} F(S) - \kappa'(S) \geq \sum_{j \in J} \psi_j(\kappa_j, w_j) + (\kappa'_i)^{1/q} \delta + \min_{S \subseteq J} F(S) - \kappa^*(S) = \Theta_p(w) + \delta M$  with  $M = (\kappa'_i)^{1/q} > 0$ . The proposition then follows by lemma 7.  $\square$

**Proposition 4.** *If  $F = F_-$  and  $J$  is strongly stable w.r.t  $\Omega_\infty$ , then  $J$  is strongly stable w.r.t  $F$ . Similarly, for any monotone  $F$ , if  $J$  is strongly stable w.r.t  $\Theta_\infty$ , then  $J$  is strongly stable w.r.t  $F$ .*

*Proof.*  $F(A + i) = \Omega_\infty(\mathbf{1}_A + \mathbf{1}_i) = \Theta_\infty(\mathbf{1}_A + \mathbf{1}_i) > \Omega_\infty(\mathbf{1}_A) = \Theta_\infty(\mathbf{1}_A) = F(A), \forall A \subseteq J$ .  $\square$

**Corollary 3.** *If  $F$  is monotone submodular and  $J$  is weakly stable w.r.t  $\Omega_\infty = \Theta_\infty$  then  $J$  is weakly stable w.r.t  $F$ .*

*Proof.* If  $F$  is a monotone submodular function, then  $\Omega_\infty(w) = \Theta_\infty(w) = f_L(|w|)$ . If  $J$  is not weakly stable w.r.t  $F$ , then  $\exists i \in J^c$  s.t.,  $F(J \cup \{i\}) = F(J)$ . Thus, given any  $w, \text{supp}(w) = J$ , choosing  $0 < \delta < \min_{i \in J} |w_i|$ , result in  $f_L(|w| + \delta \mathbf{1}_i) = f_L(|w|)$ , which contradicts the weak stability of  $J$  w.r.t to  $\Omega_\infty = \Theta_\infty$ .  $\square$
